# Supplementary material for: Engineering of NIR fluorescent PEGylated poly(RGD) proteinoid polymers and nanoparticles for drug delivery applications in chicken embryo and mouse models
Source: Royal Society of Chemistry journal article supplement (doi:10.1039/d0ra06069k), 2020-01-01
Supplement: d0ra06069k1.pdf [file d0ra06069k1.pdf]

**Supplementary material**

**Engineering of NIR Fluorescent PEGylated Poly(RGD) Proteinoid  
Polymers and Nanoparticles for Drug Delivery Applications in Chicken  
Embryo and Mouse Models**

Elad Hadad, a Safra Rudnick-Glick, a Igor Grinberg, a Ronen Yehudab and Shlomo Margel\*a

a.Department of Chemistry, Institute of Nanotechnology & Advanced Materials, Bar Ilan University, Ramat-Gan, Israel

b.Department of Life Science, Bar Ilan University, Ramat-Gan, Israel

\*Corresponding author

Supporting information including:

Figure S1. DLS of PEGylated(5000) ICG-encapsulated P(R<sup>D</sup>GD) NPs, PEGylated (750) ICG-encapsulated P(R<sup>D</sup>GD) NPs, and non-PEGylated of ICG-encapsulated P(R<sup>D</sup>GD) NPs

Table S1. Hydrodynamic diameters (nm) of PEGylated(5000) ICG-encapsulated P(R<sup>D</sup>GD) NPs, PEGylated (750) ICG-encapsulated P(R<sup>D</sup>GD) NPs, and non-PEGylated of ICG-encapsulated P(R<sup>D</sup>GD) NPs

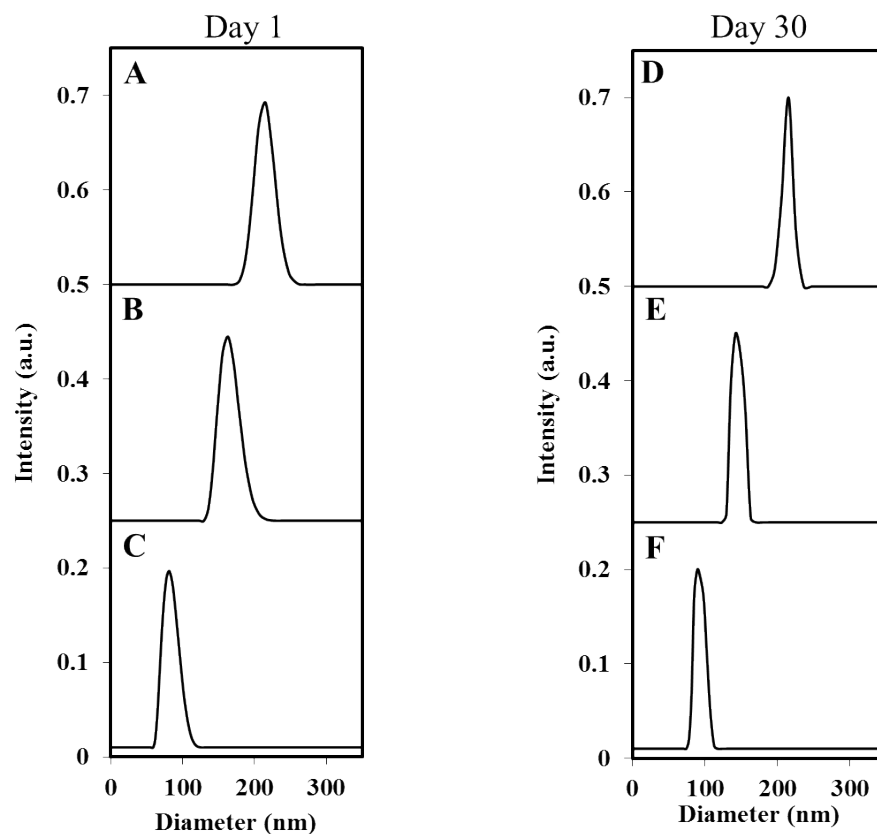

Figure S1. Size distributions measured by the DLS at the beginning of the storage and at 30 days following the start of PEGylated (5000) ICG-encapsulated P(R<sup>D</sup>GD) NPs (A,D), PEGylated (750) ICG-encapsulated P(R<sup>D</sup>GD) NPs (B,E), and non-PEGylated of ICG-encapsulated P(R<sup>D</sup>GD) NPs(C,F), respectively.

| NPs series                                             | hydrodynamic diameter following 1 day of storage (nm) | hydrodynamic diameter following 30 day of storage (nm) |
|--------------------------------------------------------|-------------------------------------------------------|--------------------------------------------------------|
| ICG-encapsulated P(R <sup>D</sup> GD)                  | 93±20                                                 | 93±23                                                  |
| PEGylated (750) ICG-encapsulated P(R <sup>D</sup> GD)  | 177 ± 30                                              | 140±20                                                 |
| PEGylated (5000) ICG-encapsulated P(R <sup>D</sup> GD) | 216 ± 25                                              | 215±22                                                 |

Table S1. Analyze of the size distributions measured by the DLS at the beginning of the storage and at 30 days following the start of PEGylated (5000) ICG-encapsulated P(R<sup>D</sup>GD) NPs, PEGylated (750) ICG-encapsulated P(R<sup>D</sup>GD) NPs, and non-PEGylated of ICG-encapsulated P(R<sup>D</sup>GD) NPs. No significantly change in the non-PEGylated and PEGylated ICG-encapsulated P(R<sup>D</sup>GD) NPs diameter was observed.
